# Supplementary material for: Dynamics of mobile genetic elements of Listeria monocytogenes persisting in ready-to-eat seafood processing plants in France
Source: PubMed Central journal article supplement (PMC7006209; doi:10.1186/s12864-020-6544-x), 2020-02-06
Supplement: 12864_2020_6544_MOESM2_ESM.pdf [file 12864_2020_6544_MOESM2_ESM.pdf]

1 **Additional file 2: Characterization of selected bacterial strains through pulsed-field gel**  
 2 **electrophoresis**

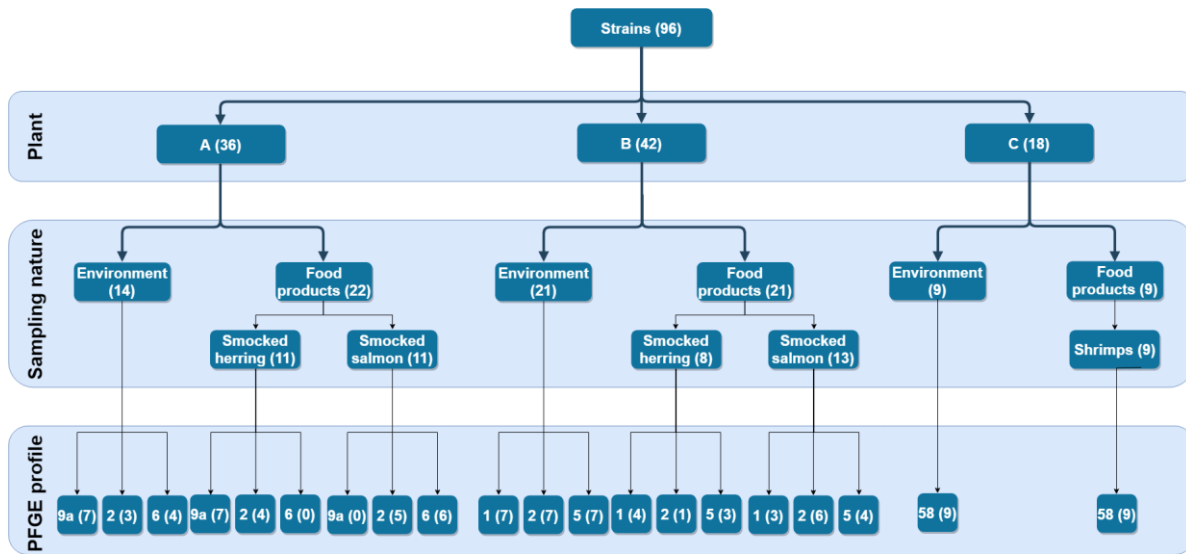

3  
 4 Pulsed-field gel electrophoresis (PFGE) typing was performed on all the *Listeria monocytogenes* strains  
 5 from the collection of the Laboratory of seafood products (Boulogne-sur-Mer, France). Both *ApaI* and  
 6 *Ascl* enzymes for restriction digestion were used as previously described by Midelet et al. (2007) for  
 7 the pulsotype determination [1]. Electrophoretic patterns were analysed using Bionumerics software  
 8 v 6.5 (Applied Maths, Sint-Martens-Latem, Belgium). The DNA bands generated by single and  
 9 combinations of restriction enzymes were analysed using Dice's coefficient with a maximum position  
 10 tolerance of 1.2% and the PFGE profile assigned to each strain. Some PFGE profiles (e.g. profile 1, 5, 6,  
 11 9a and 58) were found to be specific to each company while other (e.g. profile 2) common to plants A  
 12 and B. Moreover, the same PFGE profile was repeatedly isolated over time from different food  
 13 matrices (i.e. salmon and herring) as well as from environmental sites even after C&D. The information  
 14 about the genotype and its recurrence in the processing plants and in the samples of different nature  
 15 was considered for the selection of 96 *Listeria monocytogenes* strains for whole genome sequencing.

16  
 17 **References**

18 1. Midelet-Bourdin G, Leleu G, Malle P. Evaluation of the international reference methods NF EN ISO  
 19 11290-1 and 11290-2 and an in-house method for the isolation of *Listeria monocytogenes* from retail  
 20 seafood products in France. J Food Prot. 2007;70:891–900.
