# Supplementary material for: Dynamics of mobile genetic elements of Listeria monocytogenes persisting in ready-to-eat seafood processing plants in France
Source: PubMed Central journal article supplement (PMC7006209; doi:10.1186/s12864-020-6544-x), 2020-02-06

- 1 Additional file 6. Accessory genes-based Neighbour-joining clustering and pangenome matrix of 94
- 2 *L. monocytogenes* isolates

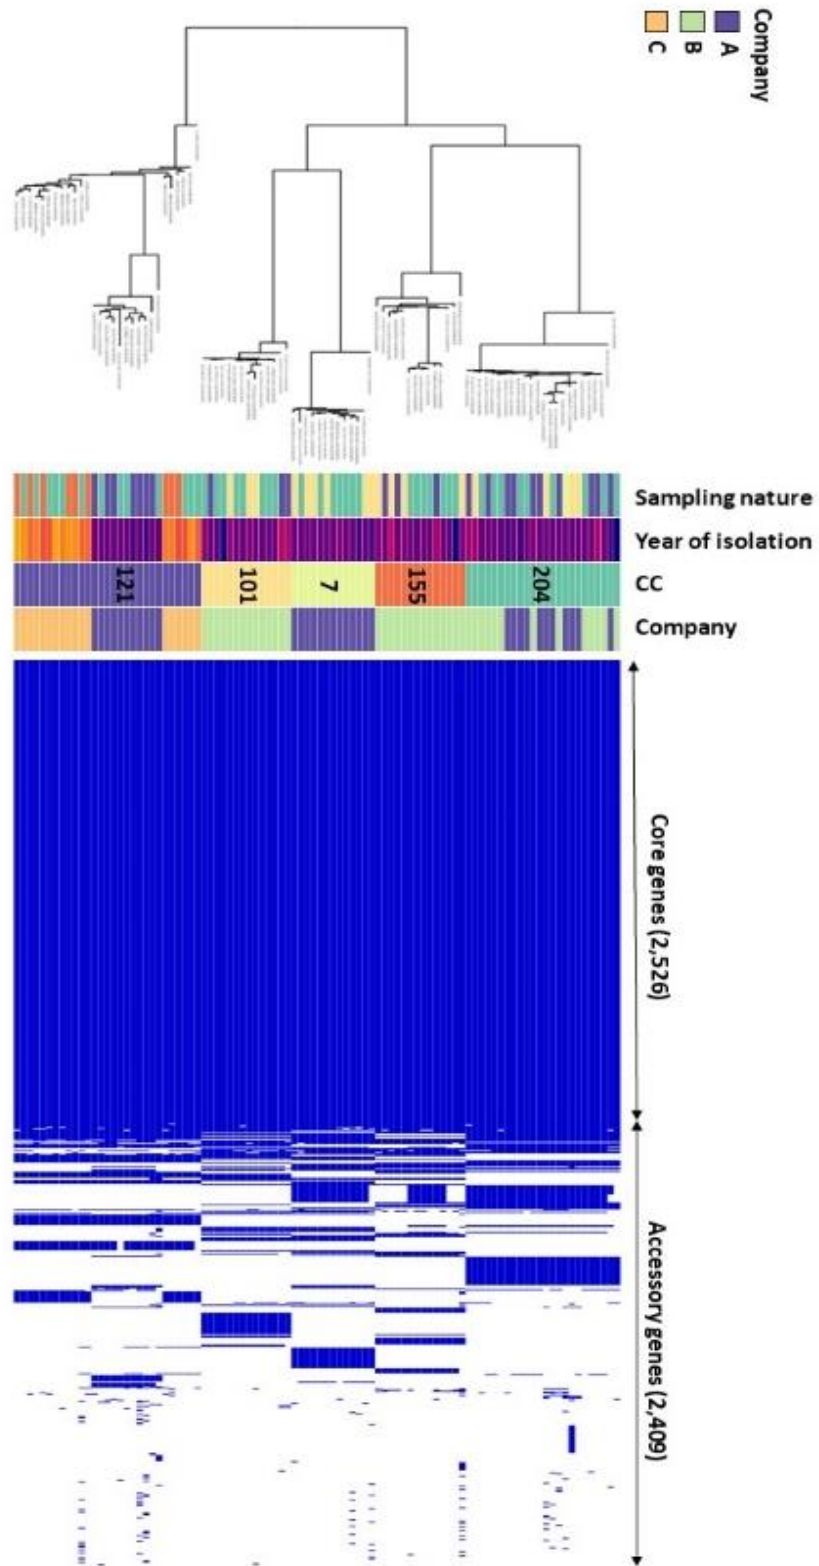

Supplement: 12864_2020_6544_MOESM6_ESM.pdf [file 12864_2020_6544_MOESM6_ESM.pdf]
