# Supplementary material for: Dynamics of mobile genetic elements of Listeria monocytogenes persisting in ready-to-eat seafood processing plants in France
Source: PubMed Central journal article supplement (PMC7006209; doi:10.1186/s12864-020-6544-x), 2020-02-06
Supplement: 12864_2020_6544_MOESM8_ESM.pdf [file 12864_2020_6544_MOESM8_ESM.pdf]

1 **Additional file 8. Main genetic component of pLM80-like and pLM6179-like plasmids**

2 The gene encoding for VirB protein from type IV secretion system along with traG characterized the  
3 conjugative system of plasmids from CC121 whereas traCDG and genes encoding for putative conjugal  
4 transfer protein described the mobility of pLM80-like plasmids. Genes encoding for Tra-family proteins  
5 involved in plasmid conjugal transfer such as traG, have been already described in *L. monocytogenes*  
6 [1]. Moreover, all plasmids detected in this study contained a number of transposable elements (TEs)  
7 such as Tn3, Tn7, Tn5422 and Tn522 family transposases, along with several insertion sequences (ISs)  
8 such as IS3, IS6, IS1216 and IS30 flanking the stress-tolerance genes. In addition to disinfectants and  
9 heavy metals resistance genes described above, genetic features like the copper-responsive  
10 transcriptional repressor CopY [2], the DEAD/DEAH-box helicase conferring resistance to low  
11 temperature growth [3], the oxidative-stress-inducible qorB encoding quinone oxidoreductase and the  
12 RavA ATPase for response to acid stress conditions, were included in the pLM80-like plasmids. Several  
13 genes predicted in pLM80-like plasmids encoded mechanisms playing an important role in protecting  
14 cells against oxidative stress. In particular, a glycine betaine/carnitine transport binding protein, GbuC,  
15 for hyperosmotic stress reduction [4]; a Zinc-transporting ATPase, zosA, for the hydrolysis of ATP with  
16 the transport of zinc into the cell; a gene encoding putative NADH peroxidase (npr) shown to reduce  
17 hydrogen peroxide in *Lactobacillus casei* [5]; and the Chaperone protein ClpB involved in general stress  
18 tolerance but also in virulence of *L. monocytogenes* in food samples [6]. More recently, Naditz et al.  
19 (2019) analysed the differences between wild type and plasmid-cured *L. monocytogenes* strains  
20 exposed to stress conditions and described the plasmid-encoded ClpB protein as possibly contributing  
21 to increase survival to heat stress at 55 °C. A different protease of the Clp-family (ClpC subunit) sharing  
22 the same domain that contains an ATP-binding site is encoded in the plasmids from CC121. Proteins  
23 from this superfamily are thought to protect cells from stress by controlling the aggregation and  
24 denaturation of vital cellular structures and recently shown to significantly increase resistance to heat  
25 shock in *L. monocytogenes* [7]. The plasmids from CC121 were also characterized by the presence of a  
26 Toxin-Antitoxin (TA) systems composed of closely linked genes (e.g. mazF/chpS) encoding a toxic and

27 an antitoxin protein. The plasmid-encoded TA systems appears to be involved in the plasmid  
28 maintenance in daughter cells as well as in plasmid-plasmid competition through a post-segregational  
29 killing or addiction mechanism, relying on the inhibition of the target cell growth and/or survival due  
30 to the toxin-target interaction, once the toxin is released from the TA complex [8].

## 31 **References**

- 32 1. Bakker HC den, Bowen BM, Rodriguez-Rivera LD, Wiedmann M. FSL J1-208, a Virulent Uncommon  
33 Phylogenetic Lineage IV *Listeria monocytogenes* Strain with a Small Chromosome Size and a Putative  
34 Virulence Plasmid Carrying Internalin-Like Genes. *Appl Environ Microbiol.* 2012;78:1876–89.
- 35 2. Rademacher C, Masepohl B. Copper-responsive gene regulation in bacteria. *Microbiology.*  
36 2012;158:2451–64.
- 37 3. Chan YC, Wiedmann M. Physiology and Genetics of *Listeria Monocytogenes* Survival and Growth at  
38 Cold Temperatures. *Critical Reviews in Food Science and Nutrition.* 2008;49:237–53.
- 39 4. Angelidis AS, Smith GM. Three transporters mediate uptake of glycine betaine and carnitine by  
40 *Listeria monocytogenes* in response to hyperosmotic stress. *Appl Environ Microbiol.* 2003;69:1013–  
41 22.
- 42 5. Serata M, Iino T, Yasuda E, Sako T. Roles of thioredoxin and thioredoxin reductase in the resistance  
43 to oxidative stress in *Lactobacillus casei*. *Microbiology.* 2012;158:953–62.
- 44 6. Mujahid S, Pechan T, Wang C. Protein expression by *Listeria monocytogenes* grown on a RTE-meat  
45 matrix. *Int J Food Microbiol.* 2008;128:203–11.
- 46 7. Pöntinen A, Aalto-Araneda M, Lindström M, Korkeala H. Heat Resistance Mediated by pLM58  
47 Plasmid-Borne ClpL in *Listeria monocytogenes*. *mSphere.* 2017;2. doi:10.1128/mSphere.00364-17.
- 48 8. Guglielmini J, Van Melderden L. Bacterial toxin-antitoxin systems. *Mob Genet Elements.*  
49 2011;1:283–90.
